# Supplementary material for: Cadmium associates with oxalate in calcium oxalate crystals and competes with calcium for translocation to stems in the cadmium bioindicator Gomphrena claussenii
Source: Royal Society of Chemistry journal article supplement (doi:10.1039/c8mt00149a), 2018-01-01
Supplement: c8mt00149a1.pdf [file c8mt00149a1.pdf]

## Supplementary material

to

### **Cadmium associates with oxalate in calcium oxalate crystals and competes with calcium for translocation to stems in the cadmium bioindicator *Gomphrena claussenii***

Paula PONGRAC, Tânia S. SERRA, Hiram CASTILLO-MICHEL, Katarina VOGEL-MIKUŠ, Iztok ARČON, Mitja KELEMEN, Boštjan JENČIČ, Anja KAVČIČ, Mina T. VILLAFORT CARVALHO, Mark G.M AARTS

The following supporting information is available:

**Figure S1** The Cd L<sub>3</sub> edge μ-XANES spectra measured in selected Ca oxalate crystals (in stems and leaves) and in the Cd-enriched pixel in a root of *Gomphrena claussenii* grown in hydroponics, exposed to 1 mM (1Ca) or 10 mM (10Ca) CaSO<sub>4</sub> + 0.1 mM CdSO<sub>4</sub>, and Cd L<sub>3</sub> edge μ-XANES spectra of the reference compounds. eV, electron volts.

**Figure S2** Concentrations of magnesium (Mg), phosphorus (P), sulphur (S), manganese (Mn), iron (Fe) and zinc (Zn) in *Gomphrena claussenii* grown in hydroponics, exposed to different CaSO<sub>4</sub> (*Low Ca*, 0.1 mM; *Sufficient Ca*, 1 mM or *High Ca*, 10 mM) and cadmium (Cd) concentrations.

**Figure S3** Backscattered electron image of a leaf and a stem cross sections of *Gomphrena claussenii* grown in hydroponics, exposed to 1 mM CaSO<sub>4</sub> + 0.1 mM CdSO<sub>4</sub>.

**Figure S4** Phosphorus (P), sulphur (S) and potassium (K) distribution maps in a root of *Gomphrena claussenii* grown in hydroponics, exposed to 10 mM CaSO<sub>4</sub> + 0.1 mM CdSO<sub>4</sub>.

**Figure S5** Phosphorus (P), sulphur (S) and potassium (K) distribution maps in an oxalate crystal in a stem and a leaf cross-section of *Gomphrena claussenii* grown in hydroponics, exposed to 1 mM CaSO<sub>4</sub> + 0.1 mM CdSO<sub>4</sub>.

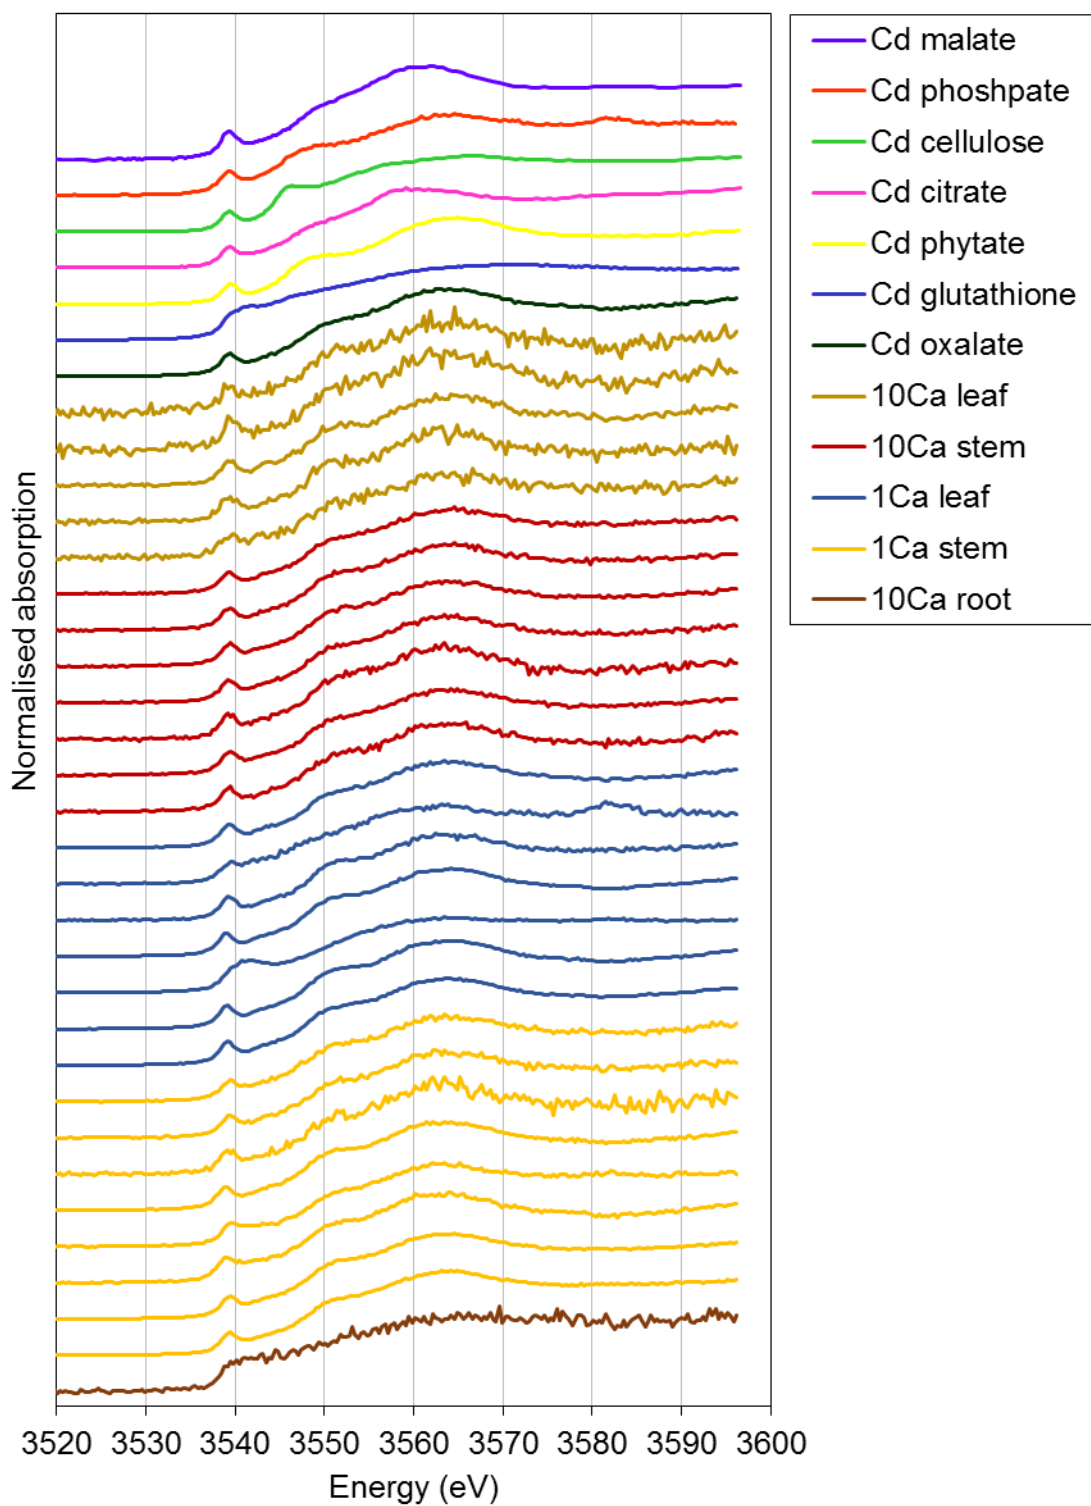

**Figure S1** The Cd L<sub>3</sub> edge  $\mu$ -XANES spectra measured in selected Ca oxalate crystals (in stems and leaves) and in the Cd-enriched pixel in a root of *Gomphrena claussenii* grown in hydroponics, exposed to 1 mM (1Ca) or 10 mM (10Ca) CaSO<sub>4</sub> + 0.1 mM CdSO<sub>4</sub>, and Cd L<sub>3</sub> edge  $\mu$ -XANES spectra of the reference compounds. Spectra are shifted vertically for clarity. eV, electron volts.

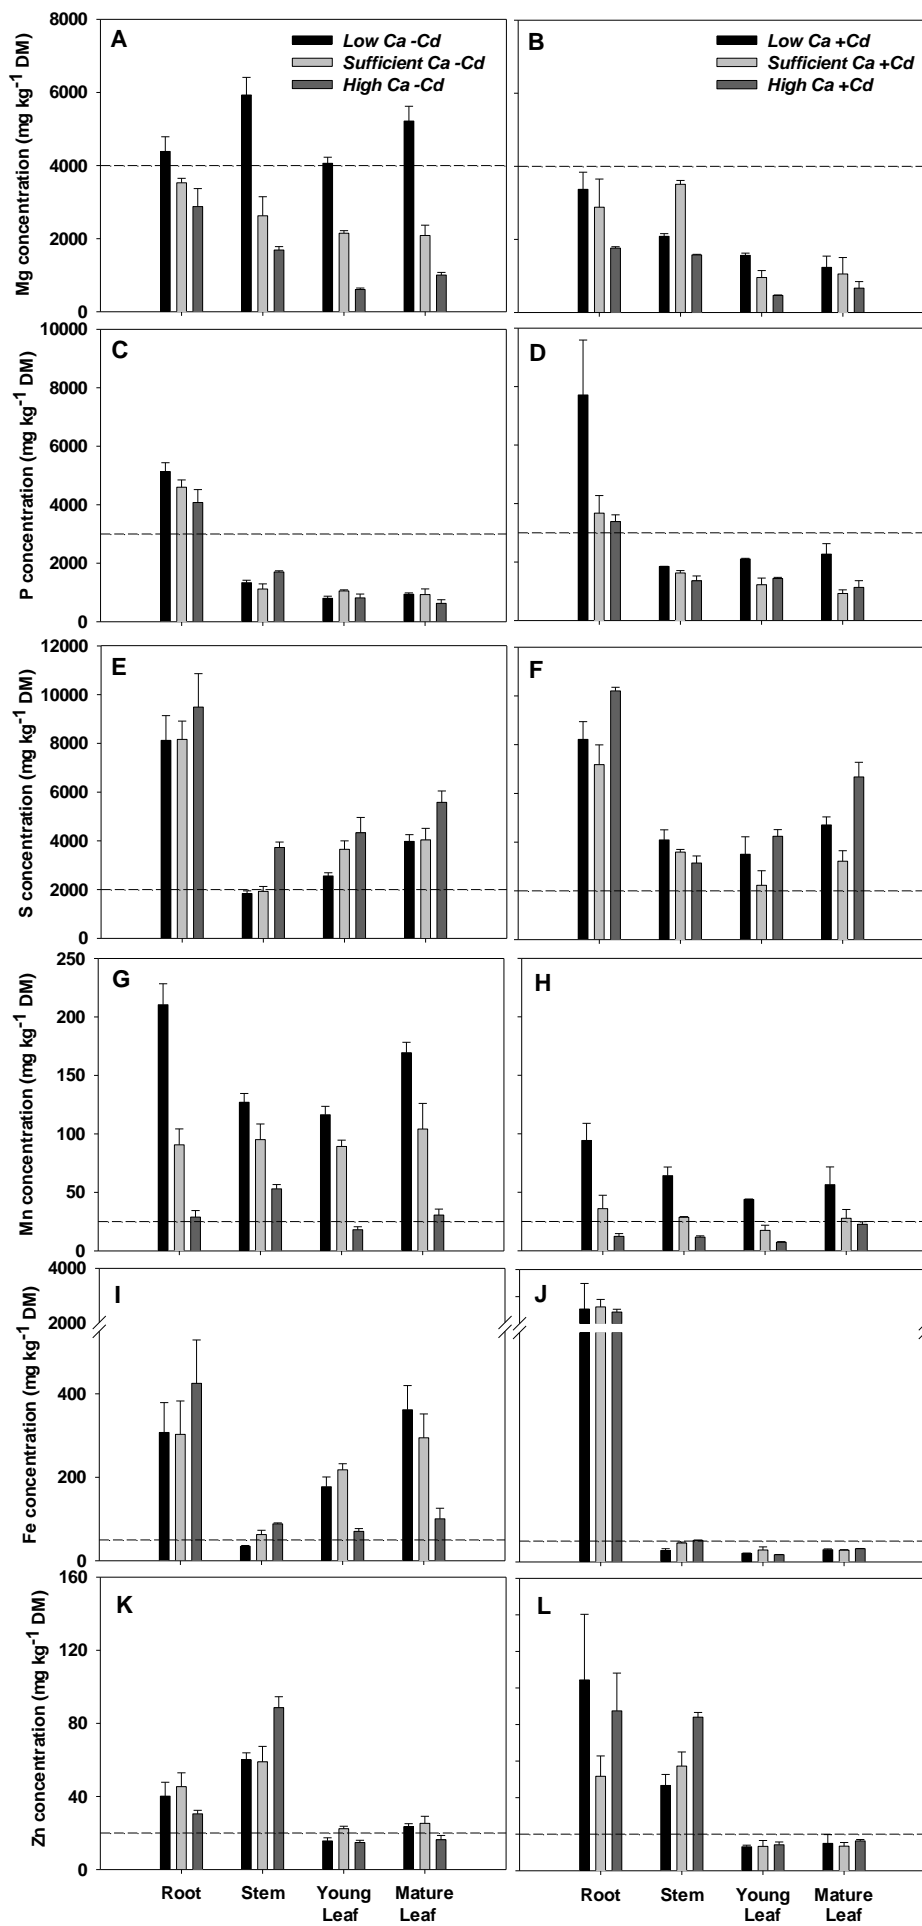

**Figure S2** Concentrations of magnesium (Mg), phosphorus (P), sulphur (S), manganese (Mn), iron (Fe) and zinc (Zn) in *Gomphrena claussenii* grown in hydroponics, exposed to different CaSO<sub>4</sub> (*Low Ca*, 0.1 mM; *Sufficient Ca*, 1 mM or *High Ca*, 10 mM) and cadmium (Cd) concentrations; no CdSO<sub>4</sub> added: *-Cd* (**A, C, E, G, I and K**), or 0.1 mM CdSO<sub>4</sub> added: *+Cd*, (**B, D, F, H, J and L**). Dashed line indicates the adequate nutrient concentration for mature spinach leaves (*Spinacia oleracea*, Amaranthaceae; <sup>1</sup>). Shown are means and standard errors; DM, dry matter.

## Reference

- 1 C. R. Campbell, 2000, 1040, 122.

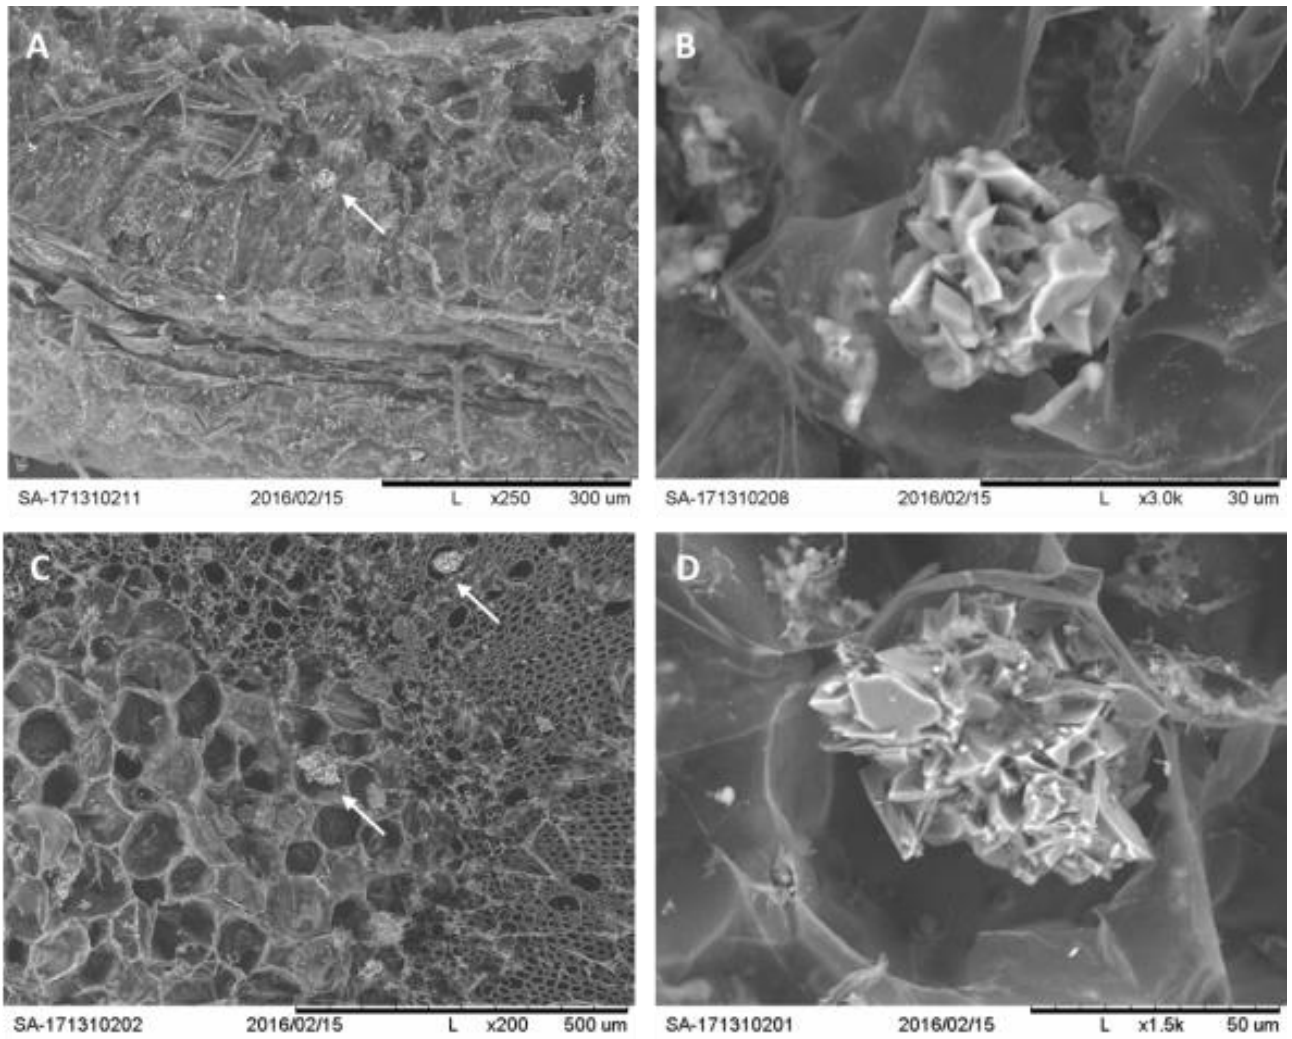

**Figure S3** Backscattered electron image of a leaf (**A** and **B**) and a stem (**C** and **D**) cross sections (with oxalate crystals in **A** and **C** indicated by arrows; **B** and **D** are zooms on these crystals) of *Gomphrena clausenii* grown in hydroponics, exposed to 1 mM  $\text{CaSO}_4$  + 0.1 mM  $\text{CdSO}_4$ .

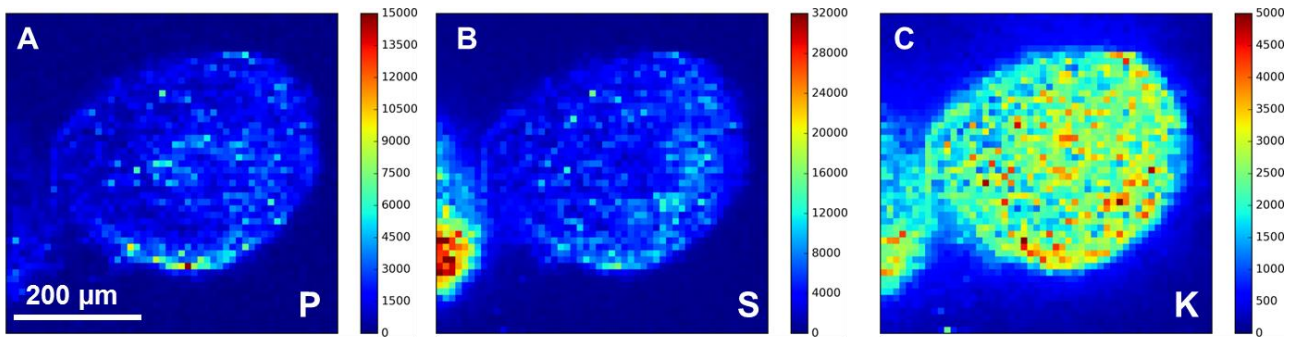

**Figure S4** Phosphorus (P; **A**), sulphur (S; **B**) and potassium (K; **C**) distribution maps in a root of *Gomphrena claussenii* grown in hydroponics, exposed to 10 mM  $\text{CaSO}_4$  + 0.1 mM  $\text{CdSO}_4$ . Colour legends to the distribution maps are in counts per second. Step size: 10  $\mu\text{m}$ .

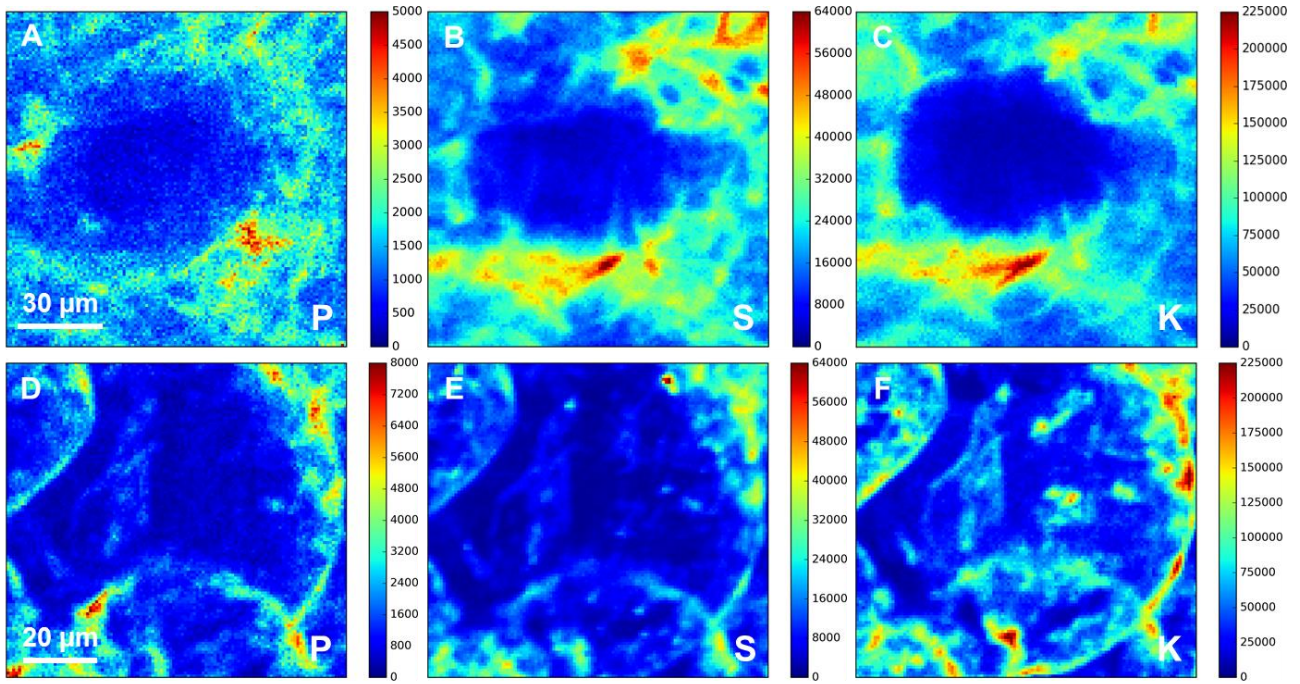

**Figure S5** Phosphorus (P; **A** and **D**), sulphur (S; **B** and **E**) and potassium (K; **C** and **F**) distribution maps in an oxalate crystal in a stem (**A-C**) and a leaf (**D-F**) cross-section of *Gomphrena claussenii* grown in hydroponics, exposed to 1 mM  $\text{CaSO}_4$  + 0.1 mM  $\text{CdSO}_4$ . Colour legends to distribution maps are in counts per second. Step size: 1  $\mu\text{m}$  (A-B) and 0.8  $\mu\text{m}$  (D-E).
